# Supplementary material
Source: MDPI journal article supplement (https://www.mdpi.com/2075-163X/12/11/1474)
Supplement: s1 [file s1]

#### Analysis

Operator: Alex  
Sample ID: Katya  
Sample Desc: 3  
Sample weight: 0.1310 g  
Analysis Time: 874.6 min  
Void Vol.: He Mode. Cell: 9mm no bulb  
Outgas Time: 4.0 hrs  
Analysis gas: Nitrogen  
Press. Tolerance: 0.030/0.030 (ads/des)

Date: 6/23/2021  
Filename:  
Comment:

#### Report

Operator: operator  
G:\QW2\_210624\_01.QPS

Date: 7/8/2021

End of run: 6/23/2021 23:13:15  
Run mode: Standard  
Outgas Temp: 100.0 C  
Bath Temp: 77.3 K  
Equil time: 600/600 sec (ads/des)  
Instrument: QuadraSorb Station 2  
Equil timeout: 900/900 sec (ads/des)

#### Data Reduction Parameters

|           |                      |                 |            |
|-----------|----------------------|-----------------|------------|
| Adsorbate | Nitrogen             | Temperature     | 77.350K    |
|           | Molec. Wt.: 28.013 g | Cross Section:  | 16.200 EI  |
|           |                      | Liquid Density: | 0.806 g/cc |

#### MBET summary

Slope = 63.813  
Intercept = 1.217e+00  
Correlation coefficient, r = 0.999743  
C constant = 53.414  
Surface Area = 53.552 ml/g

#### Multi-Point BET Plot

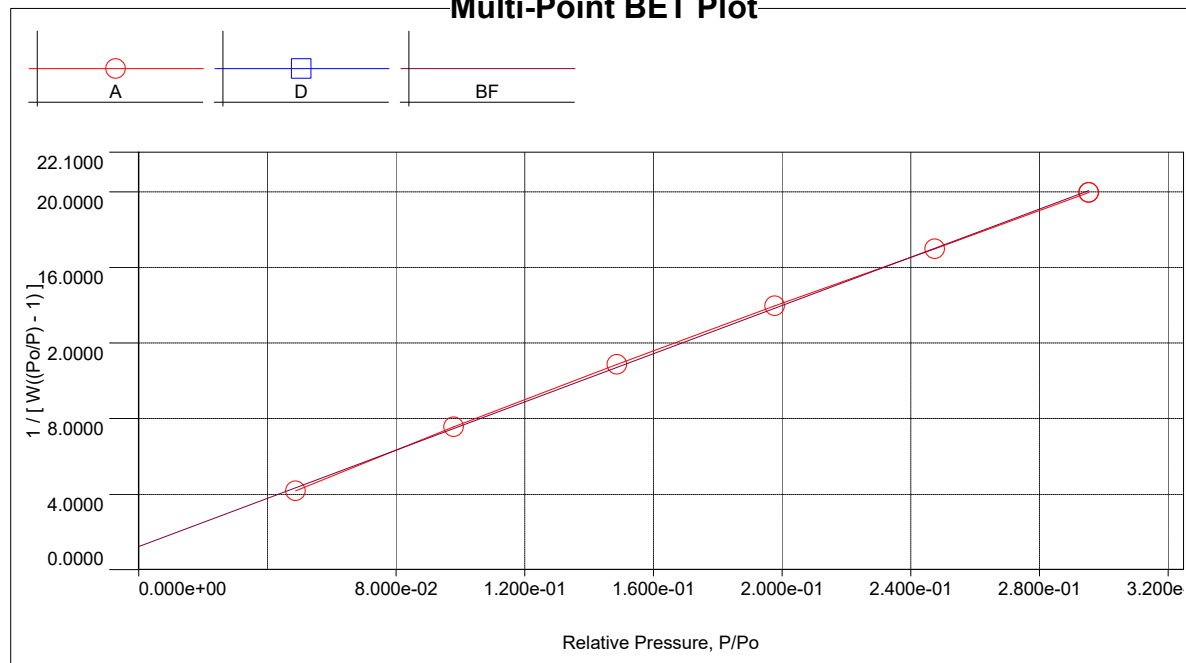

#### Multi-Point BET

| Relative Pressure<br>[P/Po] | Volume @ STP<br>[cc/g] | $1/[W((P_o/P) - 1)]$ | Relative Pressure<br>[P/Po] | Volume @ STP<br>[cc/g] | $1/[W((P_o/P) - 1)]$ |
|-----------------------------|------------------------|----------------------|-----------------------------|------------------------|----------------------|
| 4.90746e-02                 | 9.9129                 | 4.1654e+00           | 1.97711e-01                 | 14.1344                | 1.3950e+01           |
| 9.80640e-02                 | 11.5305                | 7.5446e+00           | 2.47376e-01                 | 15.5075                | 1.6959e+01           |
| 1.48758e-01                 | 12.8715                | 1.0863e+01           | 2.95211e-01                 | 16.8021                | 1.9946e+01           |

**Analysis**

Operator: Alex  
Sample ID: Katya

Date: 6/23/2021

Filename:

**Report**

Operator: operator  
G:\QW2\_210624\_01.QPS

Date: 7/8/2021

**Single Point Surface Area**

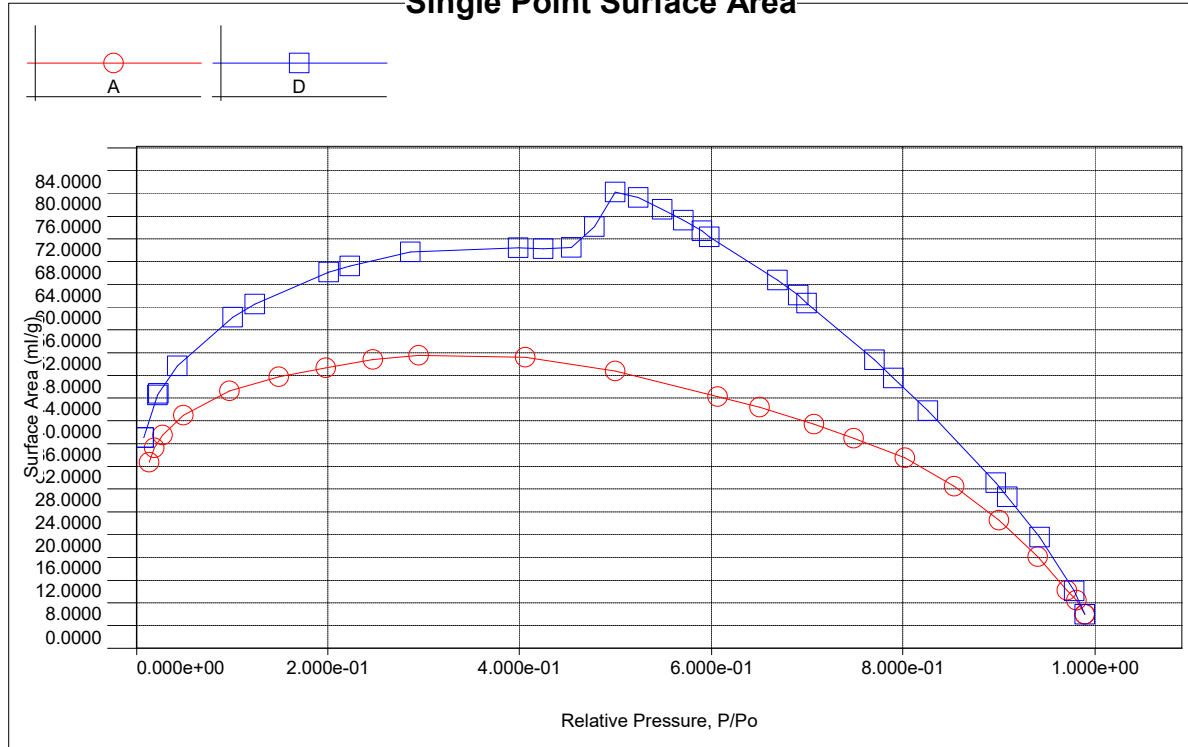

**Single Point Surface Area**

| Relative Pressure<br>[P/Po] | Volume @ STP<br>[cc/g] | 1 / [ W((P/Po) - 1) ] | Slope    | Surf. Area<br>[ml/g] |
|-----------------------------|------------------------|-----------------------|----------|----------------------|
| 1.32429e-02                 | 7.6112                 | 1.4108e+00            | 106.5340 | 32.6892              |
| 1.90486e-02                 | 8.2550                 | 1.8821e+00            | 98.8070  | 35.2456              |
| 2.75622e-02                 | 8.8592                 | 2.5598e+00            | 92.8741  | 37.4972              |
| 4.90746e-02                 | 9.9129                 | 4.1654e+00            | 84.8798  | 41.0288              |
| 9.80640e-02                 | 11.5305                | 7.5446e+00            | 76.9356  | 45.2653              |
| 1.48758e-01                 | 12.8715                | 1.0863e+01            | 73.0242  | 47.6899              |
| 1.97711e-01                 | 14.1344                | 1.3950e+01            | 70.5573  | 49.3573              |
| 2.47376e-01                 | 15.5075                | 1.6959e+01            | 68.5537  | 50.7998              |
| 2.95211e-01                 | 16.8021                | 1.9946e+01            | 67.5661  | 51.5424              |
| 4.06556e-01                 | 19.8241                | 2.7650e+01            | 68.0106  | 51.2055              |
| 4.99333e-01                 | 22.3813                | 3.5654e+01            | 71.4029  | 48.7728              |
| 6.06601e-01                 | 25.8456                | 4.7735e+01            | 78.6919  | 44.2551              |
| 6.50608e-01                 | 27.9070                | 5.3388e+01            | 82.0586  | 42.4394              |
| 7.06548e-01                 | 30.8983                | 6.2348e+01            | 88.2427  | 39.4652              |
| 7.48540e-01                 | 33.7577                | 7.0554e+01            | 94.2561  | 36.9474              |
| 8.01333e-01                 | 38.7677                | 8.3247e+01            | 103.8854 | 33.5227              |
| 8.52438e-01                 | 44.2887                | 1.0436e+02            | 122.4286 | 28.4453              |
| 8.99820e-01                 | 51.6674                | 1.3909e+02            | 154.5800 | 22.5289              |
| 9.40518e-01                 | 62.2214                | 2.0333e+02            | 216.1855 | 16.1089              |
| 9.70880e-01                 | 80.3019                | 3.3220e+02            | 342.1681 | 10.1778              |
| 9.80292e-01                 | 97.9852                | 4.0617e+02            | 414.3402 | 8.4050               |
| 9.89193e-01                 | 126.9793               | 5.7678e+02            | 583.0857 | 5.9726               |
| 9.78701e-01                 | 108.7428               | 3.3809e+02            | 345.4475 | 10.0812              |
| 9.42329e-01                 | 77.8393                | 1.6796e+02            | 178.2341 | 19.5390              |
| 9.08938e-01                 | 67.1760                | 1.1889e+02            | 130.7974 | 26.6253              |
| 8.96854e-01                 | 64.7973                | 1.0737e+02            | 119.7130 | 29.0905              |

Continued on next page

**Analysis**

Operator: Alex  
Sample ID: Katya

Date: 6/23/2021  
Filename:

**Report**

Operator: operator  
G:\QW2\_210624\_01.QPS

Date: 7/8/2021

**Single Point Surface Area** continued

| Relative Pressure<br>[P/Po] | Volume @ STP<br>[cc/g] | 1 / [ W((P/Po) - 1) ] | Slope   | Surf. Area<br>[ml/g] |
|-----------------------------|------------------------|-----------------------|---------|----------------------|
| 8.26205e-01                 | 55.2883                | 6.8797e+01            | 83.2682 | 41.8229              |
| 7.90128e-01                 | 52.0862                | 5.7832e+01            | 73.1937 | 47.5795              |
| 7.70051e-01                 | 50.7107                | 5.2837e+01            | 68.6148 | 50.7546              |
| 6.99648e-01                 | 46.4643                | 4.0112e+01            | 57.3324 | 60.7426              |
| 6.90368e-01                 | 46.0769                | 3.8717e+01            | 56.0817 | 62.0972              |
| 6.69027e-01                 | 44.9634                | 3.5970e+01            | 53.7648 | 64.7732              |
| 5.98026e-01                 | 41.3656                | 2.8776e+01            | 48.1187 | 72.3735              |
| 5.89947e-01                 | 41.1259                | 2.7990e+01            | 47.4455 | 73.4004              |
| 5.70784e-01                 | 40.2747                | 2.6419e+01            | 46.2852 | 75.2403              |
| 5.49187e-01                 | 39.3614                | 2.4763e+01            | 45.0904 | 77.2341              |
| 5.24074e-01                 | 38.2411                | 2.3040e+01            | 43.9624 | 79.2159              |
| 5.00298e-01                 | 36.8959                | 2.1711e+01            | 43.3971 | 80.2478              |
| 4.78078e-01                 | 32.6223                | 2.2466e+01            | 46.9926 | 74.1077              |
| 4.53505e-01                 | 29.6241                | 2.2413e+01            | 49.4219 | 70.4650              |
| 4.24686e-01                 | 28.0486                | 2.1057e+01            | 49.5831 | 70.2360              |
| 3.98573e-01                 | 26.9079                | 1.9706e+01            | 49.4409 | 70.4379              |
| 2.85607e-01                 | 22.4204                | 1.4267e+01            | 49.9540 | 69.7145              |
| 2.23264e-01                 | 19.8976                | 1.1558e+01            | 51.7698 | 67.2693              |
| 2.00707e-01                 | 19.0266                | 1.0560e+01            | 52.6118 | 66.1926              |
| 1.23351e-01                 | 15.8574                | 7.0996e+00            | 57.5562 | 60.5064              |
| 1.01083e-01                 | 14.8745                | 6.0488e+00            | 59.8395 | 58.1977              |
| 4.29794e-02                 | 11.9300                | 3.0120e+00            | 70.0790 | 49.6942              |
| 2.32955e-02                 | 10.5328                | 1.8118e+00            | 77.7752 | 44.7767              |
| 2.27601e-02                 | 10.4629                | 1.7810e+00            | 78.2521 | 44.5038              |
| 8.25229e-03                 | 8.5898                 | 7.7507e-01            | 93.9216 | 37.0790              |
