# Supplementary material
Source: MDPI journal article supplement (https://www.mdpi.com/2075-163X/12/11/1474)
Supplement: s1 [file s1]

### Analysis

Operator: Alex  
Sample ID: Katya

Date: 6/28/2021

Filename:  
Comment:

### Report

Operator: operator  
G:\QW2\_210629\_01.QPS

Date: 7/8/2021

Sample Desc: 1

Sample weight: 0.1650 g

Analysis Time: 916.8 min

Void Vol.: He Mode. Cell: 9mm no bulb

Outgas Time: 4.0 hrs

Analysis gas: Nitrogen

Press. Tolerance: 0.030/0.030 (ads/des)

End of run: 6/28/2021 23:22:14

Run mode: Standard

Outgas Temp: 100.0 C

Bath Temp: 77.3 K

Equil time: 600/600 sec (ads/des)

Instrument: QuadraSorb Station 2

Equil timeout: 900/900 sec (ads/des)

### Data Reduction Parameters

|                  |                      |                       |           |                        |            |
|------------------|----------------------|-----------------------|-----------|------------------------|------------|
| <b>Adsorbate</b> | Nitrogen             | <b>Temperature</b>    | 77.350K   | <b>Liquid Density:</b> | 0.806 g/cc |
|                  | Molec. Wt.: 28.013 g | <b>Cross Section:</b> | 16.200 EI |                        |            |

### MBET summary

Slope = 40.974  
Intercept = 1.863e-01  
Correlation coefficient, r = 0.999731  
C constant = 220.881  
Surface Area = 84.609 ml/g

### Multi-Point BET Plot

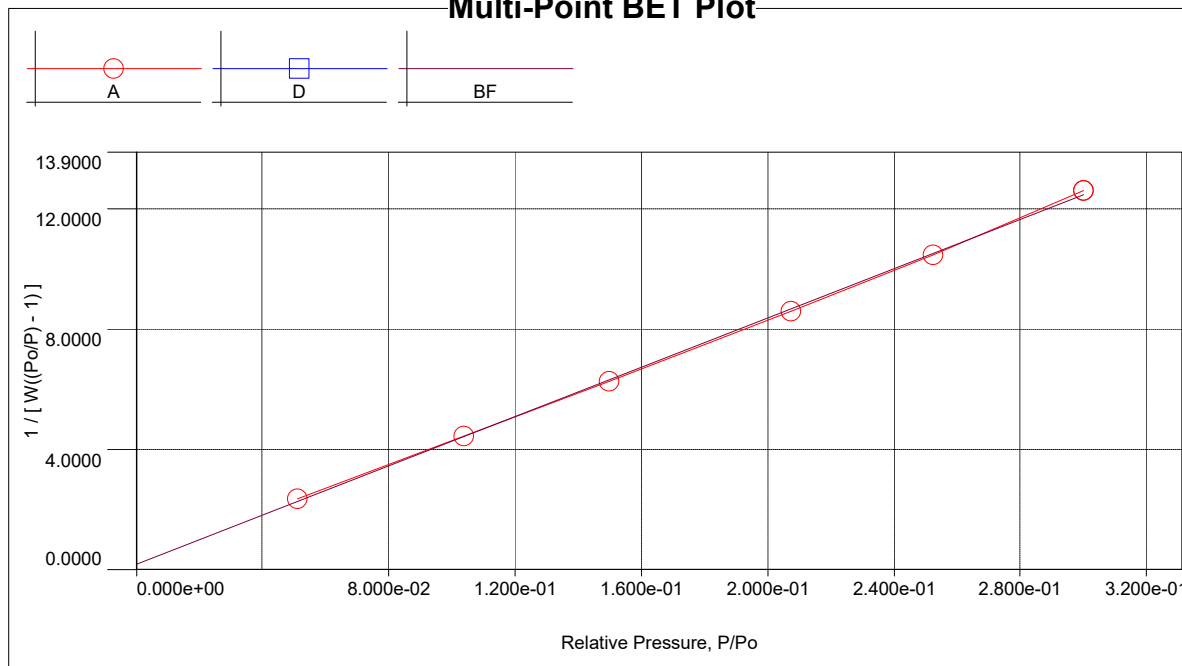

### Multi-Point BET

| Relative Pressure<br>[P/Po] | Volume @ STP<br>[cc/g] | $1 / [W((P_o/P) - 1)]$ | Relative Pressure<br>[P/Po] | Volume @ STP<br>[cc/g] | $1 / [W((P_o/P) - 1)]$ |
|-----------------------------|------------------------|------------------------|-----------------------------|------------------------|------------------------|
| 5.10282e-02                 | 18.2783                | 2.3538e+00             | 2.07482e-01                 | 24.3833                | 8.5907e+00             |
| 1.03738e-01                 | 20.8302                | 4.4459e+00             | 2.52411e-01                 | 25.8019                | 1.0470e+01             |
| 1.49761e-01                 | 22.5053                | 6.2622e+00             | 3.00085e-01                 | 27.1990                | 1.2612e+01             |

# Analysis

Operator: Alex  
Sample ID: Katya

Date: 6/28/2021

Filename:

# Report

Operator: operator  
G:\QW2\_210629\_01.QPS

Date: 7/8/2021

## Single Point Surface Area

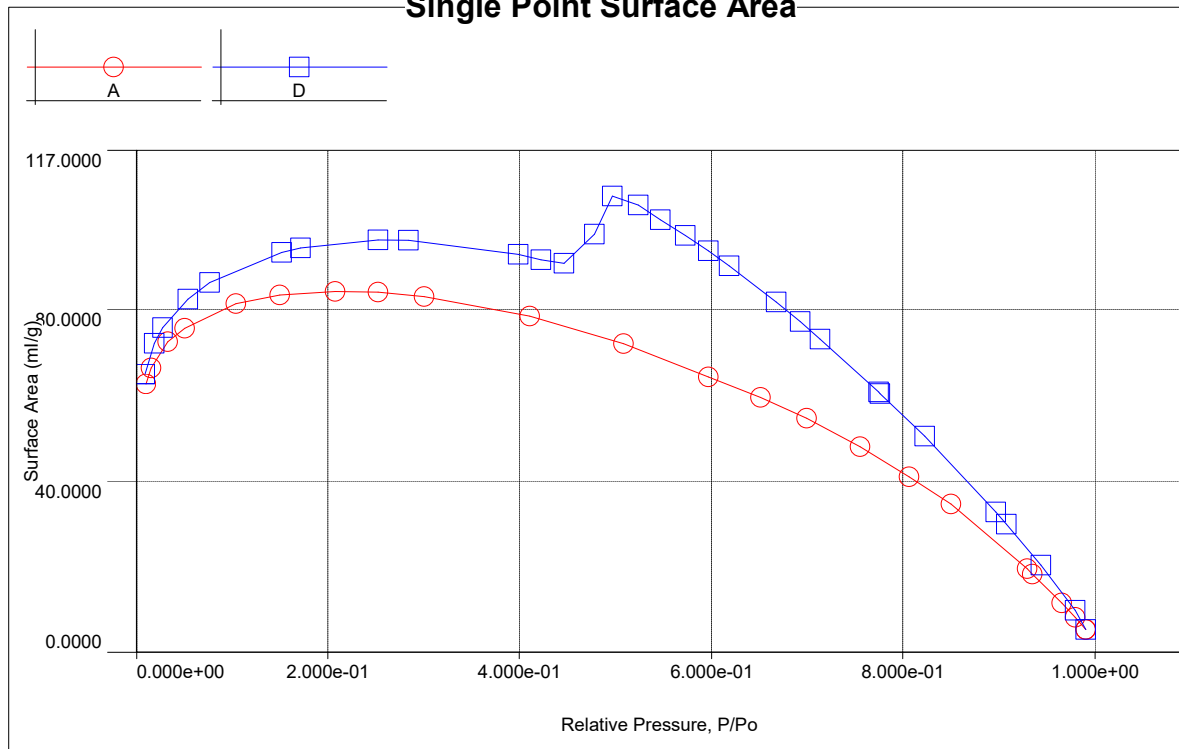

## Single Point Surface Area

| Relative Pressure<br>[P/Po] | Volume @ STP<br>[cc/g] | 1 / [ W((P/Po) - 1) ] | Slope    | Surf. Area<br>[ml/g] |
|-----------------------------|------------------------|-----------------------|----------|----------------------|
| 1.06299e-02                 | 14.5161                | 5.9221e-01            | 55.7112  | 62.5102              |
| 1.59887e-02                 | 15.4836                | 8.3964e-01            | 52.5143  | 66.3156              |
| 3.30467e-02                 | 17.1882                | 1.5909e+00            | 48.1408  | 72.3402              |
| 5.10282e-02                 | 18.2783                | 2.3538e+00            | 46.1277  | 75.4972              |
| 1.03738e-01                 | 20.8302                | 4.4459e+00            | 42.8571  | 81.2588              |
| 1.49761e-01                 | 22.5053                | 6.2622e+00            | 41.8142  | 83.2854              |
| 2.07482e-01                 | 24.3833                | 8.5907e+00            | 41.4046  | 84.1094              |
| 2.52411e-01                 | 25.8019                | 1.0470e+01            | 41.4797  | 83.9572              |
| 3.00085e-01                 | 27.1990                | 1.2612e+01            | 42.0292  | 82.8594              |
| 4.09959e-01                 | 30.5170                | 1.8217e+01            | 44.4351  | 78.3731              |
| 5.07966e-01                 | 33.5679                | 2.4607e+01            | 48.4430  | 71.8889              |
| 5.96356e-01                 | 36.5145                | 3.2374e+01            | 54.2858  | 64.1515              |
| 6.50834e-01                 | 39.0994                | 3.8143e+01            | 58.6069  | 59.4216              |
| 6.98766e-01                 | 41.6041                | 4.4611e+01            | 63.8425  | 54.5485              |
| 7.54671e-01                 | 44.8522                | 5.4875e+01            | 72.7139  | 47.8934              |
| 8.06304e-01                 | 48.5390                | 6.8618e+01            | 85.1020  | 40.9217              |
| 8.49859e-01                 | 52.8857                | 8.5637e+01            | 100.7656 | 34.5606              |
| 9.29634e-01                 | 63.5784                | 1.6626e+02            | 178.8446 | 19.4723              |
| 9.34836e-01                 | 64.1905                | 1.7882e+02            | 191.2804 | 18.2063              |
| 9.64654e-01                 | 74.9966                | 2.9117e+02            | 301.8381 | 11.5377              |
| 9.79303e-01                 | 90.2065                | 4.1968e+02            | 428.5498 | 8.1263               |
| 9.90568e-01                 | 128.8286               | 6.5226e+02            | 658.4704 | 5.2888               |
| 9.79478e-01                 | 109.3169               | 3.4933e+02            | 356.6489 | 9.7646               |
| 9.43025e-01                 | 81.7007                | 1.6209e+02            | 171.8845 | 20.2608              |
| 9.06982e-01                 | 73.7935                | 1.0572e+02            | 116.5645 | 29.8763              |
| 8.96571e-01                 | 72.5512                | 9.5598e+01            | 106.6259 | 32.6611              |

Continued on next page

**Quantachrome QuadraWin - Data Acquisition and Reduction  
for QuadraSorb SI**  
©2000-09, Quantachrome Instruments. All rights reserved.  
version 5.02

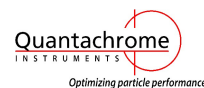

**Analysis**

**Operator:**Alex  
**Sample ID:** Katya

**Date:**6/28/2021  
**Filename:**

**Report**

**Operator:**operator  
**G:\QW2\_210629\_01.QPS**

**Date:**7/8/2021

**Single Point Surface Area** continued

| Relative Pressure<br>[P/Po] | Volume @ STP<br>[cc/g] | 1 / [ W((P/Po) - 1) ] | Slope   | Surf. Area<br>[ml/g] |
|-----------------------------|------------------------|-----------------------|---------|----------------------|
| 8.21890e-01                 | 64.9301                | 5.6863e+01            | 69.1858 | 50.3357              |
| 7.75298e-01                 | 61.6792                | 4.4758e+01            | 57.7305 | 60.3237              |
| 7.74383e-01                 | 61.7559                | 4.4469e+01            | 57.4248 | 60.6448              |
| 7.13646e-01                 | 58.5638                | 3.4049e+01            | 47.7109 | 72.9921              |
| 6.92781e-01                 | 57.6204                | 3.1313e+01            | 45.1988 | 77.0489              |
| 6.67816e-01                 | 56.4735                | 2.8483e+01            | 42.6508 | 81.6518              |
| 6.18428e-01                 | 54.1887                | 2.3931e+01            | 38.6959 | 89.9971              |
| 5.96476e-01                 | 53.2747                | 2.2200e+01            | 37.2186 | 93.5692              |
| 5.72275e-01                 | 52.2178                | 2.0501e+01            | 35.8234 | 97.2133              |
| 5.46446e-01                 | 51.0630                | 1.8878e+01            | 34.5474 | 100.8040             |
| 5.23294e-01                 | 50.2060                | 1.7494e+01            | 33.4306 | 104.1715             |
| 4.96958e-01                 | 48.5555                | 1.6279e+01            | 32.7572 | 106.3129             |
| 4.78250e-01                 | 42.8808                | 1.7103e+01            | 35.7623 | 97.3797              |
| 4.45942e-01                 | 37.5849                | 1.7134e+01            | 38.4221 | 90.6383              |
| 4.22896e-01                 | 36.4218                | 1.6098e+01            | 38.0658 | 91.4868              |
| 3.98303e-01                 | 35.4204                | 1.4953e+01            | 37.5422 | 92.7627              |
| 2.83620e-01                 | 30.8034                | 1.0284e+01            | 36.2583 | 96.0474              |
| 2.52138e-01                 | 29.5362                | 9.1330e+00            | 36.2222 | 96.1432              |
| 1.72209e-01                 | 26.1427                | 6.3670e+00            | 36.9726 | 94.1919              |
| 1.52216e-01                 | 25.2583                | 5.6875e+00            | 37.3647 | 93.2035              |
| 7.66658e-02                 | 21.4381                | 3.0989e+00            | 40.4208 | 86.1566              |
| 5.36961e-02                 | 19.9827                | 2.2720e+00            | 42.3123 | 82.3051              |
| 2.81597e-02                 | 17.8946                | 1.2956e+00            | 46.0079 | 75.6938              |
| 1.91416e-02                 | 16.8722                | 9.2545e-01            | 48.3473 | 72.0312              |
| 9.02250e-03                 | 15.0489                | 4.8407e-01            | 53.6516 | 64.9098              |
