# Supplementary material
Source: MDPI journal article supplement (https://www.mdpi.com/2075-163X/12/11/1474)
Supplement: s1 [file s1]

# Magnetic Nanosorbents Based on Bentonite and $\text{CoFe}_2\text{O}_4$ Spinel

Nataliya Khodosova <sup>1</sup>, Lyudmila Novikova <sup>1,\*</sup>, Elena Tomina <sup>1,2</sup>, Larisa Belchinskaya <sup>1</sup>, Alexander Zhabin <sup>2</sup>, Nikolay Kurkin <sup>2</sup>, Victoria Krupskaya <sup>3</sup>, Olga Zakusina <sup>3</sup>, Tatiana Koroleva <sup>3,4</sup>, Ekaterina Tyupina <sup>5,6</sup>, Alexander Vasiliev <sup>7</sup> and Pavel Kazin <sup>7</sup>

<sup>1</sup> Department of chemistry, Voronezh State University of Forestry and Technologies Named after G.F. Morozov, 8 Timiryazeva str., Voronezh 394087, Russia

<sup>2</sup> Department of General Geology and Geodynamics, Voronezh State University, 1 Universitetskaya pl., Voronezh 396036, Russia

<sup>3</sup> Institute of Geology of Ore Deposits, Petrography, Mineralogy and Geochemistry RAS, 35, Staromonetny per., Moscow 119017, Russia

<sup>4</sup> Faculty of Geology, M.V. Lomonosov Moscow State University, GSP-1, Leninskie Gory, Moscow 119991, Russia

<sup>5</sup> Department of High Energy Chemistry and Radioecology, Mendeleev University of Chemical Technology of Russia, 9, Miusskaya square, Moscow 125047, Russia

<sup>6</sup> Department of Closed Nuclear Fuel Cycle Technology, National Research Nuclear University MEPhI, Kashirskoe Highway 31, Moscow 115409, Russia

<sup>7</sup> Department of Chemistry, Lomonosov Moscow State University, 119991 Moscow, Russia

\* Correspondence: yonk@mail.ru; Tel.: +7-(473)-2537-659

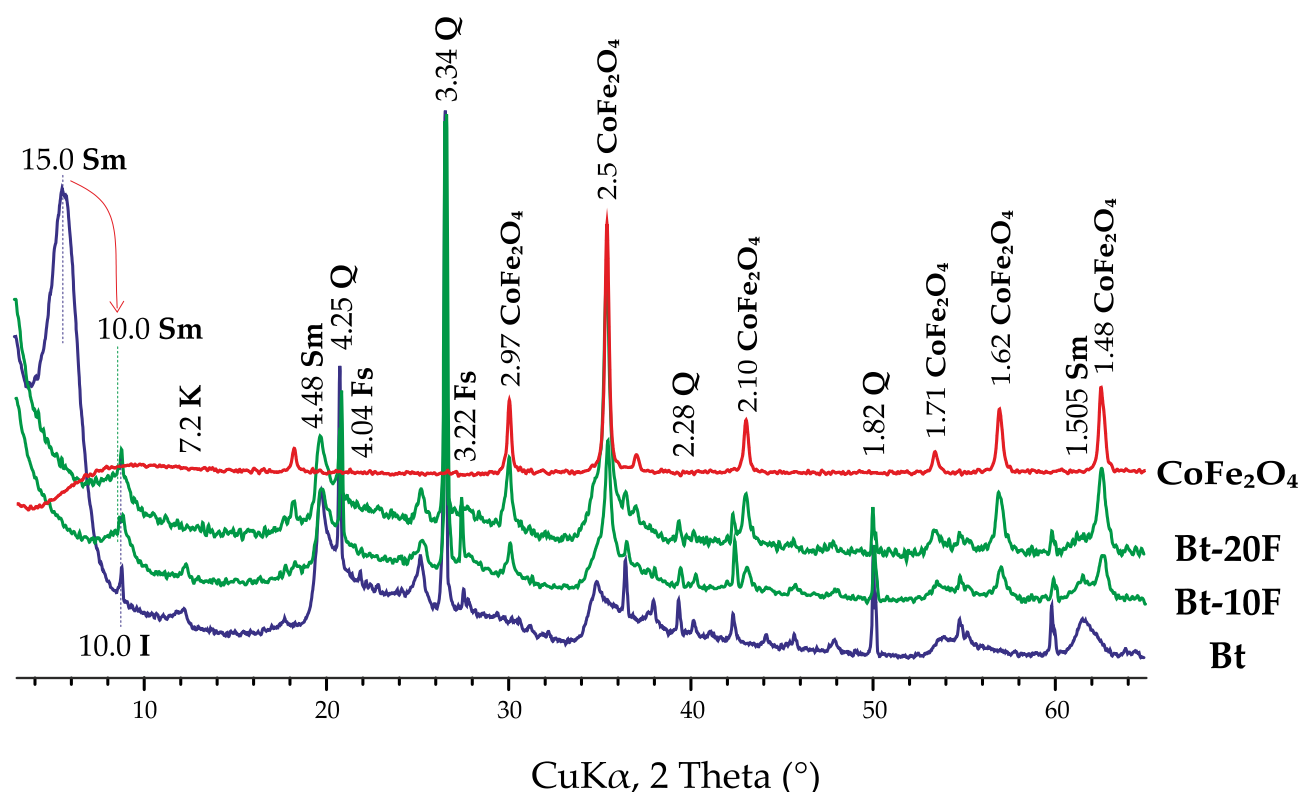

**Figure S1.** XRD patterns of investigated samples of Bt,  $\text{CoFe}_2\text{O}_4$  and composites Bt-10F, Bt-20F, Phase designations: Sm—smectite, I—illite, K—kaolinite, Q—quartz, Fs—feldspars.

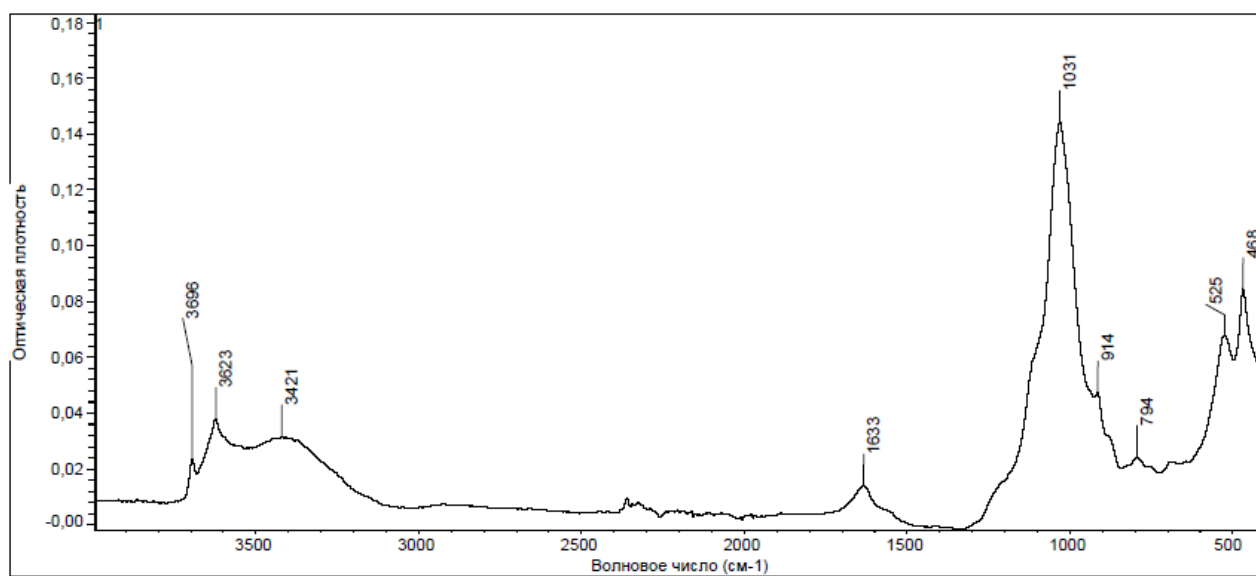

Figure S2. FTIR spectrum of Bt.

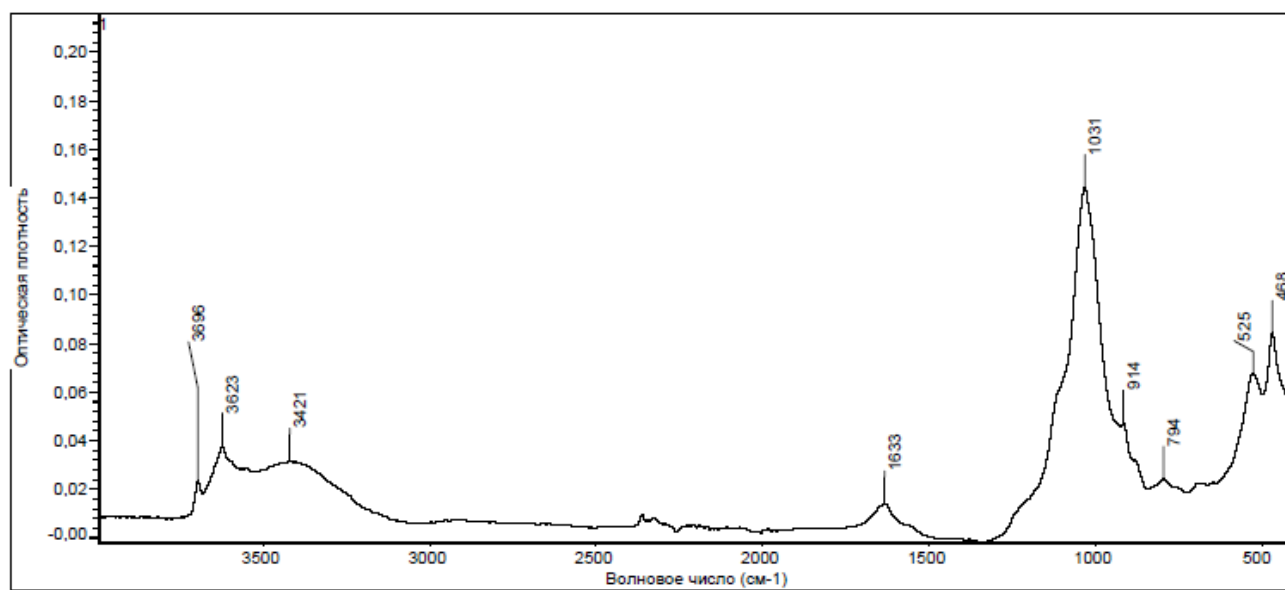

Figure S3. FTIR spectrum of Bt-10F.

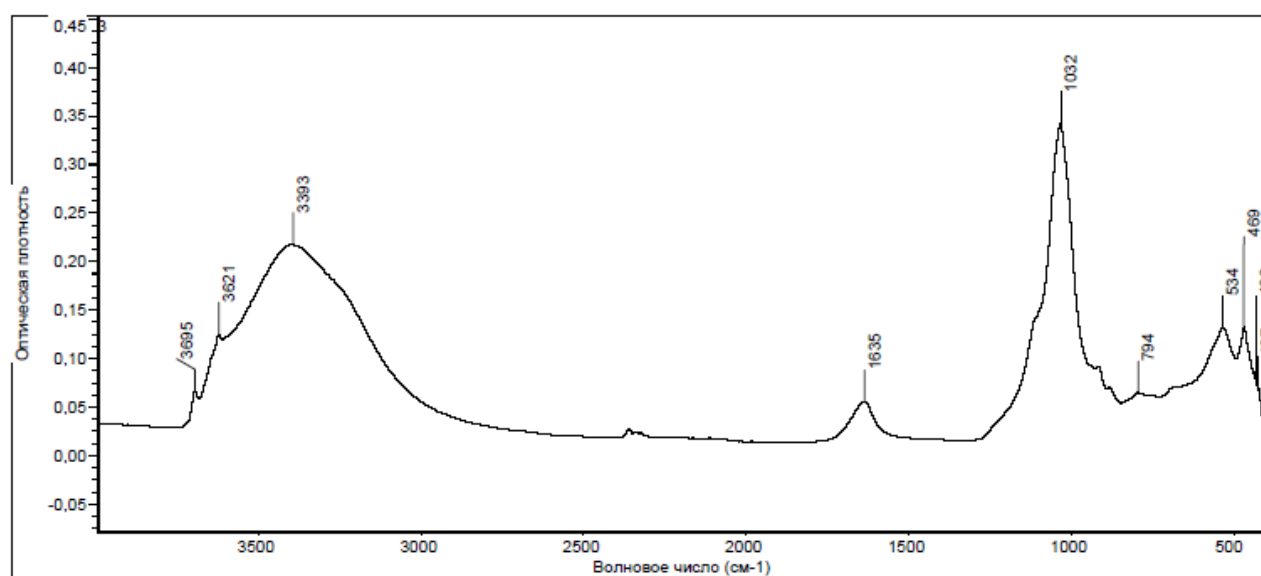

Figure S4. FTIR spectrum of Bt-10F+sorb after adsorption of formaldehyde.

Table S1. Chemical composition of the samples.

| Sample | Na <sub>2</sub> O (%) | MgO (%) | Al <sub>2</sub> O <sub>3</sub> (%) | SiO <sub>2</sub> (%) | P <sub>2</sub> O <sub>5</sub> (%) | SO <sub>3</sub> (%) | K <sub>2</sub> O (%) | CaO (%) | TiO <sub>2</sub> (%) | Fe <sub>2</sub> O <sub>3</sub> (%) | CoO (%) | NiO (%) | LOI  | Sum   |
|--------|-----------------------|---------|------------------------------------|----------------------|-----------------------------------|---------------------|----------------------|---------|----------------------|------------------------------------|---------|---------|------|-------|
| Bt-20F | 0,167                 | 1,211   | 9,266                              | 44,935               | 0,072                             | 0,024               | 0,656                | 1,564   | 2,744                | 24,492                             | 8,326   | 0,007   | 6,45 | 99,90 |
| Bt-10F | 0,109                 | 1,349   | 11,845                             | 53,9                 | 0,074                             | 0,018               | 0,832                | 1,476   | 3,049                | 18,036                             | 4,704   | 0,011   | 4,52 | 99,92 |
| Bt     | 0,1                   | 1,217   | 12,547                             | 61,67                | 0,091                             | 0,018               | 1,036                | 2,005   | 4,209                | 10,325                             | n.o.    | 0,014   | 6,57 | 99,91 |
