# Supplementary material
Source: MDPI journal article supplement (https://www.mdpi.com/2075-163X/12/11/1474)
Supplement: s1 [file s1]

#### Analysis

Operator: Alex  
Sample ID: Katya

Date: 6/27/2021

Filename:  
Comment:

#### Report

Operator: operator  
G:\QW2\_210628\_01.QPS

Date: 7/8/2021

Sample Desc: 2 повтор

Sample weight: 0.1350 g

Analysis Time: 854.8 min

Void Vol.: He Mode. Cell: 9mm no bulb

Outgas Time: 4.0 hrs

Analysis gas: Nitrogen

Press. Tolerance: 0.030/0.030 (ads/des)

End of run: 6/27/2021 22:29:54

Run mode: Standard

Outgas Temp: 100.0 C

Bath Temp: 77.3 K

Equil time: 600/600 sec (ads/des)

Instrument: QuadraSorb Station 2

Equil timeout: 900/900 sec (ads/des)

#### Data Reduction Parameters

|                  |                      |                       |           |                        |            |
|------------------|----------------------|-----------------------|-----------|------------------------|------------|
| <b>Adsorbate</b> | Nitrogen             | <b>Temperature</b>    | 77.350K   | <b>Liquid Density:</b> | 0.806 g/cc |
|                  | Molec. Wt.: 28.013 g | <b>Cross Section:</b> | 16.200 EI |                        |            |

#### MBET summary

Slope = 56.432  
Intercept = 1.248e+00  
Correlation coefficient, r = 0.999774  
C constant = 46.219  
Surface Area = 60.377 ml/g

#### Multi-Point BET Plot

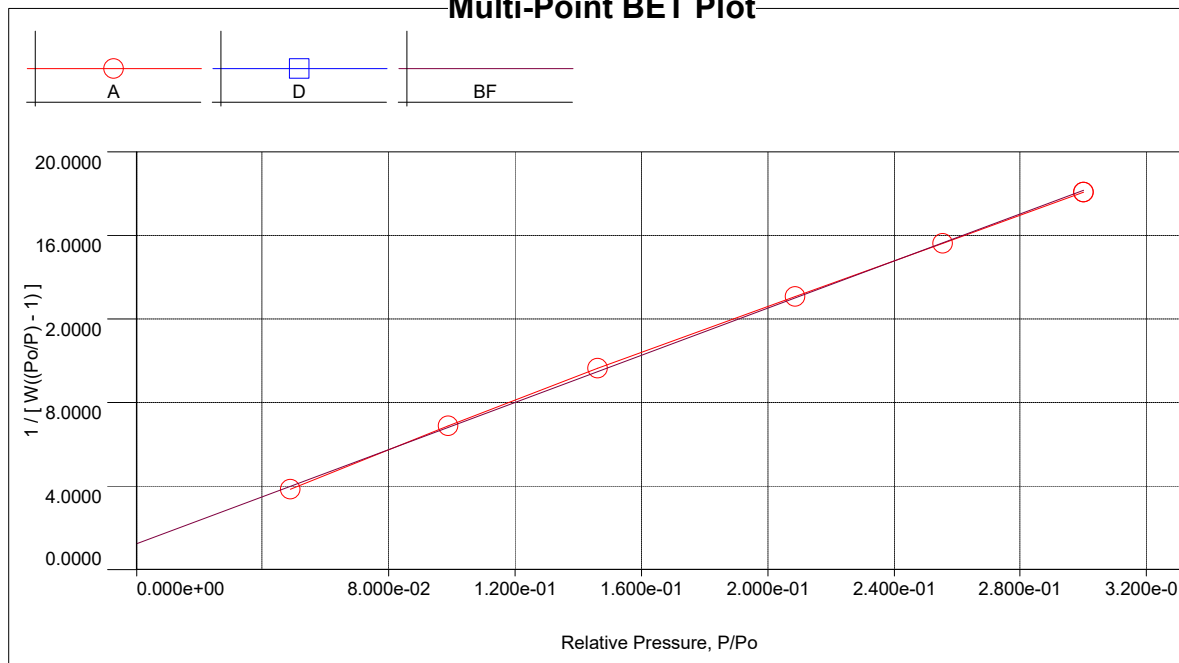

#### Multi-Point BET

| Relative Pressure<br>[P/Po] | Volume @ STP<br>[cc/g] | $1/[W((P_o/P) - 1)]$ | Relative Pressure<br>[P/Po] | Volume @ STP<br>[cc/g] | $1/[W((P_o/P) - 1)]$ |
|-----------------------------|------------------------|----------------------|-----------------------------|------------------------|----------------------|
| 4.89284e-02                 | 10.7061                | 3.8447e+00           | 2.08800e-01                 | 16.1321                | 1.3089e+01           |
| 9.86653e-02                 | 12.7182                | 6.8866e+00           | 2.55308e-01                 | 17.5549                | 1.5626e+01           |
| 1.46102e-01                 | 14.1973                | 9.6426e+00           | 3.00003e-01                 | 18.9524                | 1.8093e+01           |

# Analysis

Operator: Alex  
Sample ID: Katya

Date: 6/27/2021

Filename:

# Report

Operator: operator  
G:\QW2\_210628\_01.QPS

Date: 7/8/2021

## Single Point Surface Area

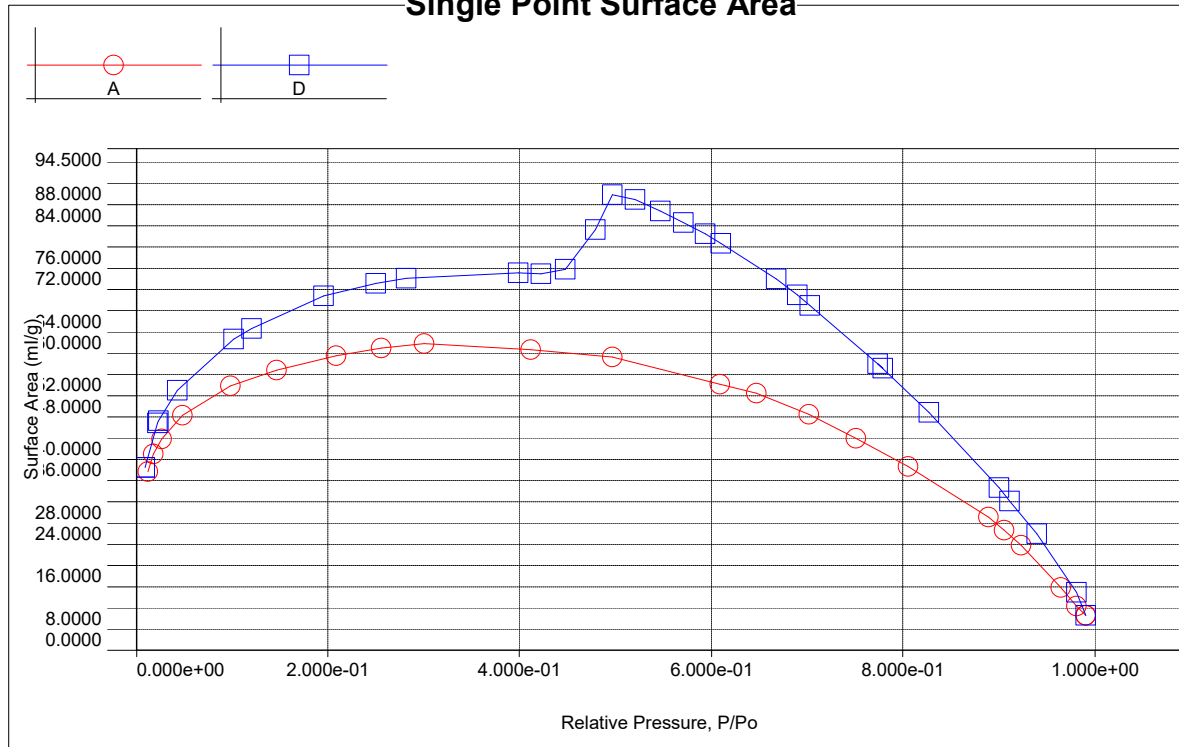

## Single Point Surface Area

| Relative Pressure<br>[P/Po] | Volume @ STP<br>[cc/g] | 1 / [ W((P/Po) - 1) ] | Slope    | Surf. Area<br>[ml/g] |
|-----------------------------|------------------------|-----------------------|----------|----------------------|
| 1.20506e-02                 | 7.8271                 | 1.2469e+00            | 103.4701 | 33.6572              |
| 1.81175e-02                 | 8.6488                 | 1.7070e+00            | 94.2183  | 36.9622              |
| 2.67873e-02                 | 9.4118                 | 2.3399e+00            | 87.3514  | 39.8679              |
| 4.89284e-02                 | 10.7061                | 3.8447e+00            | 78.5787  | 44.3188              |
| 9.86653e-02                 | 12.7182                | 6.8866e+00            | 69.7971  | 49.8949              |
| 1.46102e-01                 | 14.1973                | 9.6426e+00            | 65.9993  | 52.7660              |
| 2.08800e-01                 | 16.1321                | 1.3089e+01            | 62.6863  | 55.5547              |
| 2.55308e-01                 | 17.5549                | 1.5626e+01            | 61.2033  | 56.9008              |
| 3.00003e-01                 | 18.9524                | 1.8093e+01            | 60.3101  | 57.7435              |
| 4.11184e-01                 | 22.1131                | 2.5267e+01            | 61.4499  | 56.6724              |
| 4.96010e-01                 | 25.1872                | 3.1264e+01            | 63.0302  | 55.2515              |
| 6.08873e-01                 | 29.4280                | 4.2325e+01            | 69.5138  | 50.0982              |
| 6.46934e-01                 | 31.4938                | 4.6551e+01            | 71.9564  | 48.3976              |
| 7.01840e-01                 | 34.2940                | 5.4919e+01            | 78.2498  | 44.5051              |
| 7.49979e-01                 | 36.7303                | 6.5343e+01            | 87.1261  | 39.9710              |
| 8.05460e-01                 | 40.9581                | 8.0881e+01            | 100.4157 | 34.6810              |
| 8.88572e-01                 | 51.7762                | 1.2323e+02            | 138.6839 | 25.1112              |
| 9.04925e-01                 | 54.6268                | 1.3941e+02            | 154.0562 | 22.6055              |
| 9.23119e-01                 | 59.1775                | 1.6234e+02            | 175.8634 | 19.8024              |
| 9.64441e-01                 | 76.8934                | 2.8222e+02            | 292.6231 | 11.9010              |
| 9.79976e-01                 | 96.1065                | 4.0743e+02            | 415.7562 | 8.3763               |
| 9.89906e-01                 | 148.6841               | 5.2772e+02            | 533.0986 | 6.5326               |
| 9.80124e-01                 | 126.1117               | 3.1286e+02            | 319.2011 | 10.9101              |
| 9.38983e-01                 | 82.6723                | 1.4893e+02            | 158.6121 | 21.9562              |
| 9.10708e-01                 | 72.2682                | 1.1292e+02            | 123.9917 | 28.0867              |
| 8.99612e-01                 | 70.2204                | 1.0211e+02            | 113.5026 | 30.6823              |

Continued on next page

**Analysis**

Operator: Alex  
Sample ID: Katya

Date: 6/27/2021  
Filename:

**Report**

Operator: operator  
G:\QW2\_210628\_01.QPS

Date: 7/8/2021

**Single Point Surface Area** continued

| Relative Pressure<br>[P/Po] | Volume @ STP<br>[cc/g] | $1 / [ W((P/Po) - 1) ]$ | Slope    | Surf. Area<br>[ml/g] |
|-----------------------------|------------------------|-------------------------|----------|----------------------|
| 8.27098e-01                 | 59.5782                | 6.4242e+01              | 77.6718  | 44.8363              |
| 7.73638e-01                 | 54.7711                | 4.9927e+01              | 64.5350  | 53.9632              |
| 7.78297e-01                 | 55.0733                | 5.1002e+01              | 65.5297  | 53.1441              |
| 7.02980e-01                 | 50.2803                | 3.7662e+01              | 53.5755  | 65.0021              |
| 6.89326e-01                 | 49.5267                | 3.5845e+01              | 52.0003  | 66.9711              |
| 6.67841e-01                 | 48.3802                | 3.3251e+01              | 49.7894  | 69.9450              |
| 6.09704e-01                 | 45.1433                | 2.7687e+01              | 45.4112  | 76.6884              |
| 5.93650e-01                 | 44.3694                | 2.6345e+01              | 44.3779  | 78.4741              |
| 5.70693e-01                 | 43.1018                | 2.4677e+01              | 43.2401  | 80.5391              |
| 5.47025e-01                 | 41.9667                | 2.3024e+01              | 42.0892  | 82.7413              |
| 5.20472e-01                 | 40.6602                | 2.1358e+01              | 41.0361  | 84.8646              |
| 4.97022e-01                 | 39.2335                | 2.0152e+01              | 40.5457  | 85.8912              |
| 4.78873e-01                 | 34.9256                | 2.1051e+01              | 43.9605  | 79.2192              |
| 4.47913e-01                 | 29.8739                | 2.1729e+01              | 48.5122  | 71.7865              |
| 4.22583e-01                 | 28.2285                | 2.0744e+01              | 49.0877  | 70.9448              |
| 3.98002e-01                 | 27.1523                | 1.9482e+01              | 48.9495  | 71.1451              |
| 2.81423e-01                 | 22.3902                | 1.3995e+01              | 49.7302  | 70.0283              |
| 2.49989e-01                 | 21.1759                | 1.2594e+01              | 50.3780  | 69.1277              |
| 1.95444e-01                 | 19.0567                | 1.0199e+01              | 52.1850  | 66.7340              |
| 1.20208e-01                 | 15.8273                | 6.9071e+00              | 57.4597  | 60.6080              |
| 1.01796e-01                 | 14.9911                | 6.0488e+00              | 59.4213  | 58.6072              |
| 4.30229e-02                 | 11.7542                | 3.0602e+00              | 71.1305  | 48.9595              |
| 2.34462e-02                 | 10.1709                | 1.8887e+00              | 80.5557  | 43.2311              |
| 2.28021e-02                 | 10.0793                | 1.8523e+00              | 81.2342  | 42.8701              |
| 8.79242e-03                 | 7.9901                 | 8.8826e-01              | 101.0257 | 34.4716              |
