# Supplementary material
Source: MDPI journal article supplement (https://www.mdpi.com/2075-163X/12/11/1474)
Supplement: s1 [file s1]

#### Analysis

Operator: Alex  
Sample ID: Katya  
Sample Desc: 4  
Sample weight: 0.2660 g  
Analysis Time: 807.4 min  
Void Vol.: He Mode. Cell: 9mm large bulb  
Outgas Time: 4.0 hrs  
Analysis gas: Nitrogen  
Press. Tolerance: 0.030/0.030 (ads/des)

Date: 6/29/2021  
Filename:  
Comment:

#### Report

Operator: operator  
G:\QW2\_210630\_01.QPS

Date: 7/8/2021

End of run: 6/29/2021 21:04:32  
Run mode: Standard  
Outgas Temp: 100.0 C  
Bath Temp: 77.3 K  
Equil time: 600/600 sec (ads/des)  
Instrument: QuadraSorb Station 2  
Equil timeout: 900/900 sec (ads/des)

#### Data Reduction Parameters

|           |                      |                 |            |
|-----------|----------------------|-----------------|------------|
| Adsorbate | Nitrogen             | Temperature     | 77.350 K   |
|           | Molec. Wt.: 28.013 g | Cross Section:  | 16.200 EI  |
|           |                      | Liquid Density: | 0.806 g/cc |

#### MBET summary

Slope = 203.825  
Intercept = 9.214e+00  
Correlation coefficient, r = 0.998409  
C constant = 23.122  
Surface Area = 16.347 ml/g

#### Multi-Point BET Plot

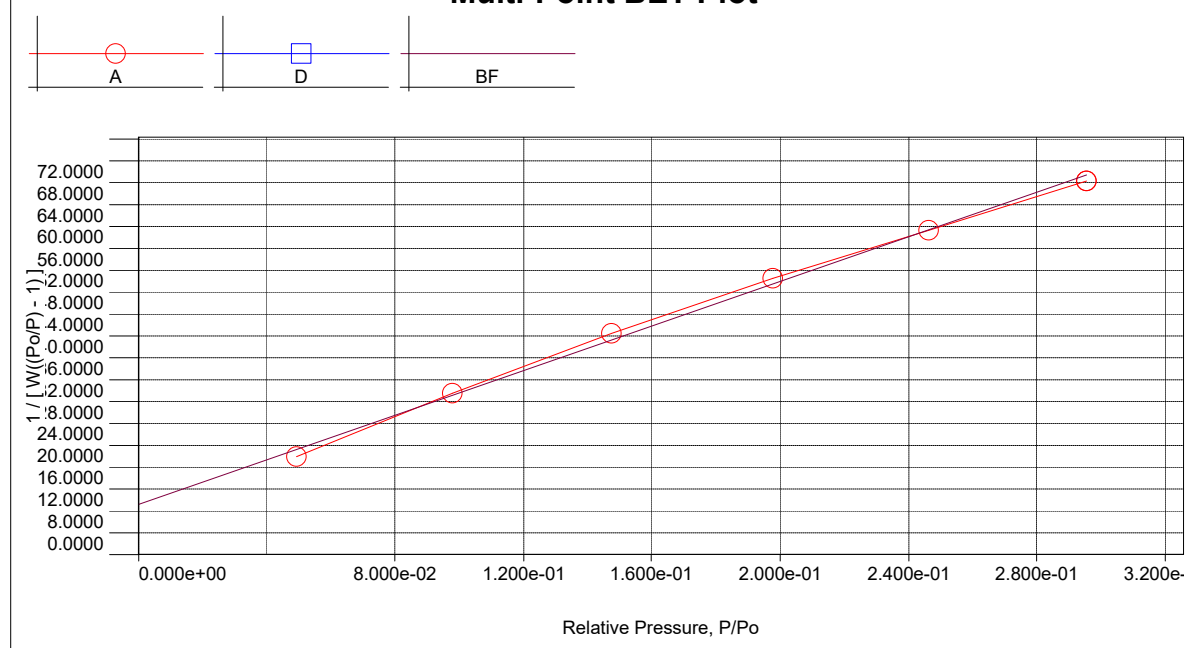

#### Multi-Point BET

| Relative Pressure<br>[P/Po] | Volume @ STP<br>[cc/g] | 1 / [ W((Po/P) - 1) ] | Relative Pressure<br>[P/Po] | Volume @ STP<br>[cc/g] | 1 / [ W((Po/P) - 1) ] |
|-----------------------------|------------------------|-----------------------|-----------------------------|------------------------|-----------------------|
| 4.93619e-02                 | 2.3212                 | 1.7899e+01            | 1.97847e-01                 | 3.9059                 | 5.0525e+01            |
| 9.78666e-02                 | 2.9427                 | 2.9496e+01            | 2.46180e-01                 | 4.4042                 | 5.9329e+01            |
| 1.47379e-01                 | 3.4179                 | 4.0464e+01            | 2.95482e-01                 | 4.9098                 | 6.8347e+01            |



# Analysis

Operator: Alex  
Sample ID: Katya

Date: 6/29/2021

Filename:

# Report

Operator: operator  
G:\QW2\_210630\_01.QPS

Date: 7/8/2021

## Single Point Surface Area

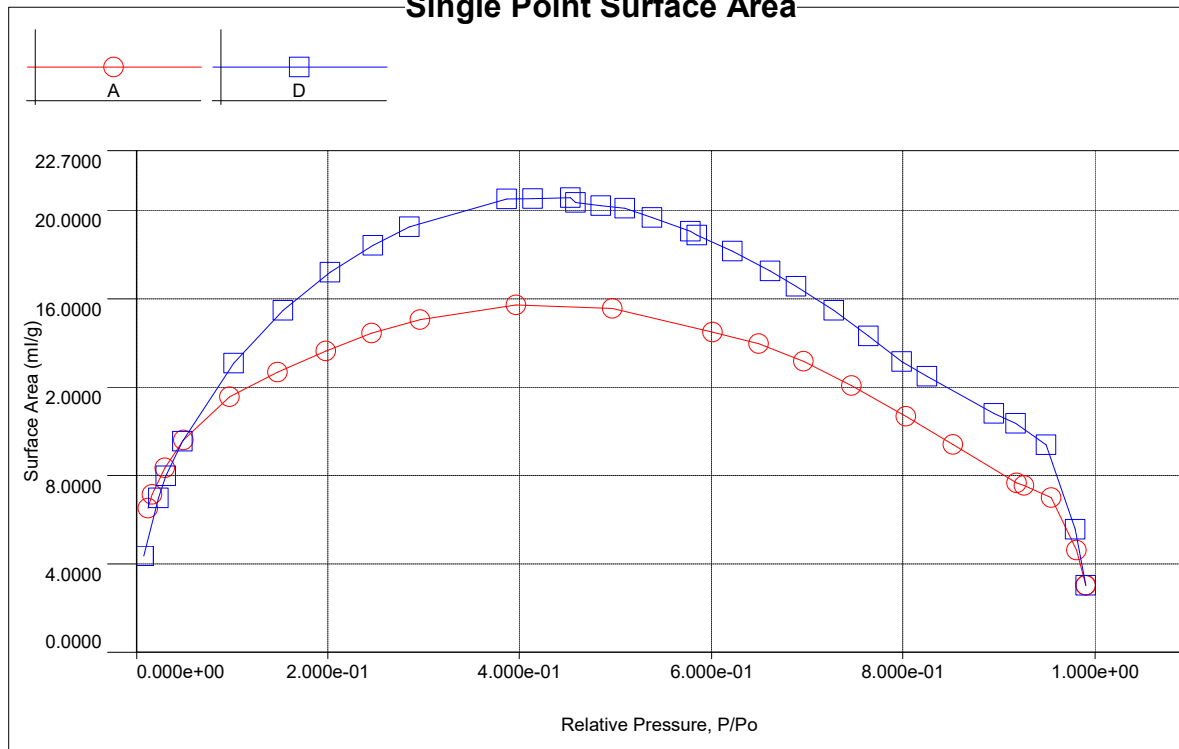

## Single Point Surface Area

| Relative Pressure<br>[P/Po] | Volume @ STP<br>[cc/g] | 1 / [ W((P/Po) - 1) ] | Slope     | Surf. Area<br>[ml/g] |
|-----------------------------|------------------------|-----------------------|-----------|----------------------|
| 1.23739e-02                 | 1.5187                 | 6.6007e+00            | 533.4384  | 6.5284               |
| 1.68202e-02                 | 1.6700                 | 8.1965e+00            | 487.3034  | 7.1465               |
| 3.03975e-02                 | 1.9770                 | 1.2688e+01            | 417.3957  | 8.3434               |
| 4.93619e-02                 | 2.3212                 | 1.7899e+01            | 362.6006  | 9.6043               |
| 9.78666e-02                 | 2.9427                 | 2.9496e+01            | 301.3934  | 11.5547              |
| 1.47379e-01                 | 3.4179                 | 4.0464e+01            | 274.5565  | 12.6842              |
| 1.97847e-01                 | 3.9059                 | 5.0525e+01            | 255.3734  | 13.6370              |
| 2.46180e-01                 | 4.4042                 | 5.9329e+01            | 240.9970  | 14.4505              |
| 2.95482e-01                 | 4.9098                 | 6.8347e+01            | 231.3080  | 15.0558              |
| 3.96368e-01                 | 5.9810                 | 8.7842e+01            | 221.6171  | 15.7141              |
| 4.96441e-01                 | 7.1024                 | 1.1106e+02            | 223.7133  | 15.5669              |
| 6.00607e-01                 | 8.3405                 | 1.4426e+02            | 240.1904  | 14.4990              |
| 6.49405e-01                 | 9.1493                 | 1.6198e+02            | 249.4336  | 13.9617              |
| 6.96098e-01                 | 9.9698                 | 1.8382e+02            | 264.0758  | 13.1876              |
| 7.46525e-01                 | 10.9386                | 2.1543e+02            | 288.5730  | 12.0681              |
| 8.03175e-01                 | 12.4728                | 2.6177e+02            | 325.9168  | 10.6853              |
| 8.52360e-01                 | 14.6311                | 3.1571e+02            | 370.3981  | 9.4021               |
| 9.17808e-01                 | 21.4158                | 4.1720e+02            | 454.5573  | 7.6613               |
| 9.26055e-01                 | 23.4792                | 4.2677e+02            | 460.8494  | 7.5567               |
| 9.54304e-01                 | 35.2509                | 4.7401e+02            | 496.7047  | 7.0112               |
| 9.80647e-01                 | 54.9020                | 7.3847e+02            | 753.0472  | 4.6246               |
| 9.90656e-01                 | 74.7879                | 1.1342e+03            | 1144.9071 | 3.0417               |
| 9.79310e-01                 | 61.8784                | 6.1204e+02            | 624.9681  | 5.5723               |
| 9.49214e-01                 | 42.4539                | 3.5225e+02            | 371.0993  | 9.3843               |
| 9.16891e-01                 | 28.6671                | 3.0792e+02            | 335.8299  | 10.3699              |
| 8.94215e-01                 | 23.4809                | 2.8804e+02            | 322.1156  | 10.8114              |

Continued on next page



**Analysis**

Operator: Alex  
Sample ID: Katya

Date: 6/29/2021  
Filename:

**Report**

Operator: operator  
G:\QW2\_210630\_01.QPS

Date: 7/8/2021

**Single Point Surface Area** continued

| Relative Pressure<br>[P/Po] | Volume @ STP<br>[cc/g] | 1 / [ W((P/Po) - 1) ] | Slope    | Surf. Area<br>[ml/g] |
|-----------------------------|------------------------|-----------------------|----------|----------------------|
| 8.24991e-01                 | 16.4133                | 2.2980e+02            | 278.5445 | 12.5026              |
| 7.98224e-01                 | 14.9889                | 2.1117e+02            | 264.5509 | 13.1639              |
| 7.63426e-01                 | 13.9092                | 1.8563e+02            | 243.1543 | 14.3223              |
| 7.27452e-01                 | 13.0476                | 1.6367e+02            | 224.9972 | 15.4780              |
| 6.87818e-01                 | 12.1906                | 1.4461e+02            | 210.2416 | 16.5644              |
| 6.61379e-01                 | 11.7142                | 1.3341e+02            | 201.7074 | 17.2652              |
| 6.22006e-01                 | 11.0311                | 1.1936e+02            | 191.8874 | 18.1488              |
| 5.84418e-01                 | 10.4302                | 1.0788e+02            | 184.5863 | 18.8666              |
| 5.78386e-01                 | 10.3861                | 1.0568e+02            | 182.7192 | 19.0594              |
| 5.38433e-01                 | 9.7910                 | 9.5328e+01            | 177.0473 | 19.6700              |
| 5.09919e-01                 | 9.4216                 | 8.8361e+01            | 173.2843 | 20.0971              |
| 4.84358e-01                 | 9.0053                 | 8.3458e+01            | 172.3069 | 20.2111              |
| 4.57959e-01                 | 8.6219                 | 7.8405e+01            | 171.2047 | 20.3412              |
| 4.53066e-01                 | 8.6412                 | 7.6701e+01            | 169.2937 | 20.5709              |
| 4.14189e-01                 | 8.0483                 | 7.0289e+01            | 169.7029 | 20.5213              |
| 3.85913e-01                 | 7.6753                 | 6.5511e+01            | 169.7552 | 20.5149              |
| 2.85130e-01                 | 6.1884                 | 5.1569e+01            | 180.8600 | 19.2553              |
| 2.46797e-01                 | 5.6181                 | 4.6664e+01            | 189.0801 | 18.4182              |
| 2.02210e-01                 | 4.9514                 | 4.0958e+01            | 202.5500 | 17.1934              |
| 1.53389e-01                 | 4.1999                 | 3.4516e+01            | 225.0223 | 15.4763              |
| 1.02314e-01                 | 3.3505                 | 2.7218e+01            | 266.0235 | 13.0910              |
| 4.80945e-02                 | 2.3042                 | 1.7544e+01            | 364.7898 | 9.5466               |
| 3.13222e-02                 | 1.8924                 | 1.3671e+01            | 436.4639 | 7.9789               |
| 2.30561e-02                 | 1.6430                 | 1.1493e+01            | 498.4752 | 6.9863               |
| 8.11667e-03                 | 1.0108                 | 6.4773e+00            | 798.0286 | 4.3639               |
